# Supplementary material for: On the heterogeneity of fluorescence lifetime of room temperature ionic liquids: onset of a journey for exploring red emitting dyes
Source: Royal Society of Chemistry journal article supplement (doi:10.1039/c2cc32177g), 2012-01-01

**On the Heterogeneity of Fluorescence Lifetime of Room Temperature Ionic Liquids: Onset of a Journey Exploring Red Emitting Dyes**

Anup Ghosh, Tanmay Chatterjee, Prasun K. Mandal\*

*Department of Chemical Sciences, Indian Institute of Science Education and Research (IISER)-Kolkata,  
Mohanpur Campus, West-Bengal, 741252, India*

- S1: Absorption spectra of [emim][FAP] and [hydemim][FAP].
- S2: Excitation wavelength dependent emission spectra of emim][FAP] and [hydemim][FAP].
- S3: Detailed chart of fluorescence lifetime of [emim][FAP] at two different excitation wavelengths and various monitoring wavelengths.
- S4: Decay profile of [hydemim][FAP].
- S5: Detailed chart of fluorescence lifetime of [hydemim][FAP] at two different excitation wavelengths and various monitoring wavelengths.
- S6: Fluorescence decay curve of LD 700 in [hydemim][FAP] with  $\lambda_{\text{ex}} = 634$  nm and  $\lambda_{\text{em}} = 650$  nm .
- S7: Fluorescence decay curve of OX725 in [hydemim][FAP] with  $\lambda_{\text{ex}} = 634$  nm and  $\lambda_{\text{em}} = 650$  nm.
- S8: Detailed fluorescence lifetime chart of LD 700 and OX 725 in [emim][FAP] and [hydemim][FAP].
- S9: Decay curves of LD 700 in [emim][FAP] with  $\lambda_{\text{ex}} = 377$  nm and 402 nm and  $\lambda_{\text{em}} = 650$  nm.
- S10: Decay curves of LD 700 in [hydemim][FAP] with  $\lambda_{\text{ex}} = 377$  nm and 402 nm and  $\lambda_{\text{em}} = 650$  nm.
- S11: Decay curves of OX 725 in [emim][FAP] with  $\lambda_{\text{ex}} = 377$  nm and 402 nm and  $\lambda_{\text{em}} = 650$  nm.
- S12: Decay curves of OX 725 in [hydemim][FAP] with different  $\lambda_{\text{ex}} = 377$  nm and 402 nm and  $\lambda_{\text{em}} = 650$  nm.
- S13: Absorption and emission spectra of LD 700 in [emim][FAP] and [hydemim][FAP].
- S14: Absorption and emission spectra of OX 725 in [emim][FAP] and [hydemim][FAP].

#### Experimental:

Both [emim][FAP] and [hydemim][FAP] were procured from Merck (High purity grade) and were used without further purification. LD700 and OX 725 were procured from Exciton (laser grade) and were used without further purification. Steady state absorption and fluorescence spectra were recorded in a UV-visible spectrophotometer (Cary 300 Bio, Varian) and a spectrofluorimeter (Fluoromax 3, Horiba Jobin Yvon), respectively. The fluorescence spectra were corrected for the instrument response. Fluorescence lifetime measurements were carried out using a time correlated single-photon counting (TCSPC) spectrometer (Horiba Jobin Yvon IBH). Different diode lasers ( $\lambda_{\text{ex}}$  = 375 nm, 402 nm and 635 nm) were used as the excitation source and an MCP photomultiplier tube (PMT) (Hamamatsu R3809U-50 series) as the detector. The width of the instrument response function (IRF), which was limited by the fwhm of the exciting pulse, was less than 100 ps for 375 nm, 402 nm and 635 nm excitation sources. IRF was recorded using a scatterer (dilute solution of Ludox in water). Nonlinear least-squares iterative deconvolution procedure using IBH DAS6 (Version 2.2) was employed in order to fit the fluorescence decay curves using a triexponential decay equation. The quality of the fit was assessed from the  $\chi^2$  values and the distribution of the residuals.

S1:

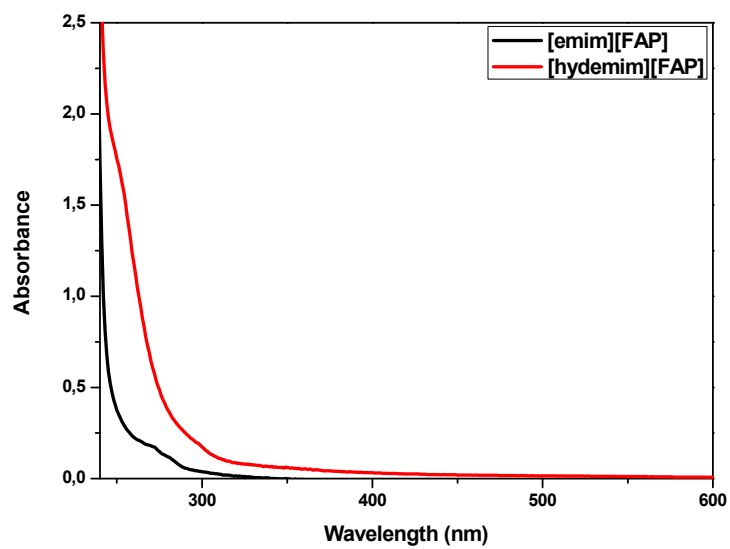

S2:

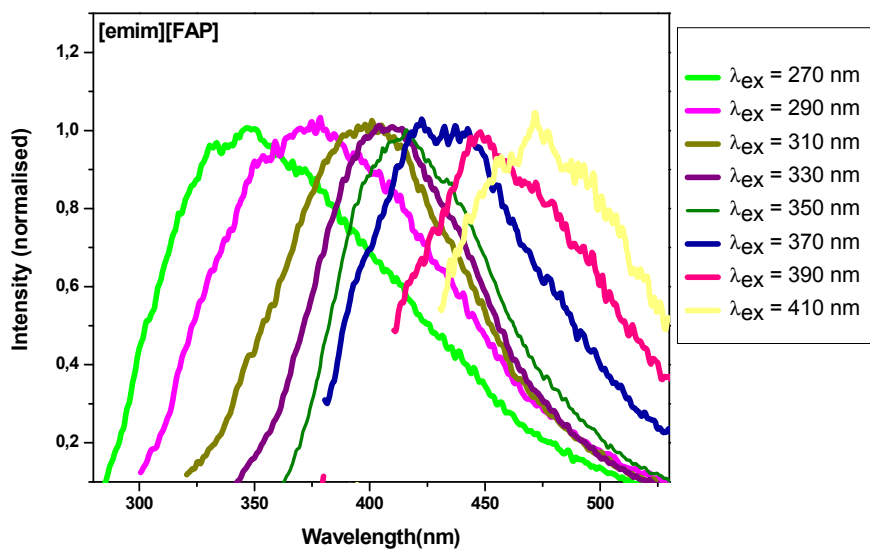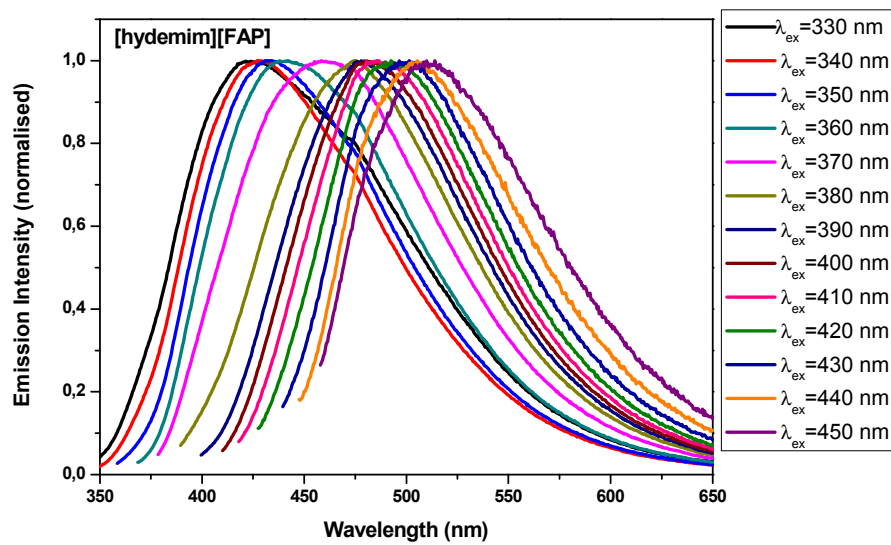

S3:

| $\lambda_{\text{ex}}$<br>(nm) | $\lambda_{\text{em}}$<br>(nm) | $\tau_1$ (ns) | $B_1$ | $\tau_2$ (ns) | $B_2$ | $\tau_3$ (ns) | $B_3$ | $\langle\tau\rangle$ | $\chi^2$ |
|-------------------------------|-------------------------------|---------------|-------|---------------|-------|---------------|-------|----------------------|----------|
| 377                           | 390                           | 0.12          | 5.42  | 1.25          | 29.81 | 10.85         | 64.77 | 7.41                 | 1.24     |
|                               | 410                           | 0.87          | 30.44 | 3.01          | 28.14 | 13.83         | 41.42 | 6.83                 | 0.99     |
|                               | 430                           | 0.84          | 19.31 | 3.25          | 25.22 | 13.30         | 55.44 | 8.35                 | 1.05     |
|                               | 440                           | 1.01          | 18.52 | 4.25          | 27.35 | 14.50         | 54.13 | 9.20                 | 1.15     |
|                               | 450                           | 0.87          | 15.71 | 3.54          | 25.5  | 12.65         | 58.79 | 8.48                 | 1.01     |
|                               | 470                           | 0.75          | 17.64 | 2.93          | 32.82 | 11.29         | 49.54 | 6.69                 | 1.04     |
|                               | 490                           | 0.69          | 14.91 | 2.94          | 34.08 | 11.11         | 51.01 | 6.77                 | 1.07     |
|                               | 510                           | 0.62          | 12.00 | 2.74          | 32.05 | 10.42         | 55.94 | 6.78                 | 1.05     |
|                               | 530                           | 0.55          | 12.18 | 2.64          | 33.86 | 10.01         | 53.96 | 6.36                 | 1.03     |
|                               | 580                           | 0.46          | 9.98  | 2.41          | 34.76 | 9.52          | 55.26 | 6.14                 | 1.08     |
|                               | 620                           | 0.41          | 13.36 | 2.20          | 36.98 | 8.90          | 49.66 | 5.28                 | 1.09     |
|                               | 660                           | 0.45          | 12.62 | 1.75          | 57.64 | 6.10          | 29.69 | 2.88                 | 1.04     |
| 402                           | 430                           | 0.58          | 16.63 | 2.11          | 37.39 | 8.16          | 45.58 | 4.61                 | 1.02     |
|                               | 450                           | 0.40          | 10.46 | 1.9           | 34.85 | 7.65          | 54.69 | 4.89                 | 1.09     |
|                               | 480                           | 0.586         | 9.76  | 2.77          | 36.84 | 9.5           | 53.4  | 6.15                 | 1.02     |
|                               | 515                           | 0.61          | 8.87  | 3.0           | 36.72 | 10.19         | 54.41 | 6.70                 | 1.03     |
|                               | 543                           | 0.468         | 9.43  | 2.28          | 32.08 | 8.54          | 58.49 | 5.77                 | 1.07     |
|                               | 590                           | 4.14          | 12.43 | 2.08          | 35.87 | 7.82          | 51.71 | 5.30                 | 1.07     |
|                               | 620                           | 0.48          | 12.72 | 2.23          | 39.97 | 8.18          | 47.31 | 4.82                 | 1.06     |
|                               | 660                           | 0.46          | 12.14 | 1.96          | 52.07 | 7.54          | 35.79 | 3.78                 | 1.07     |

S4:

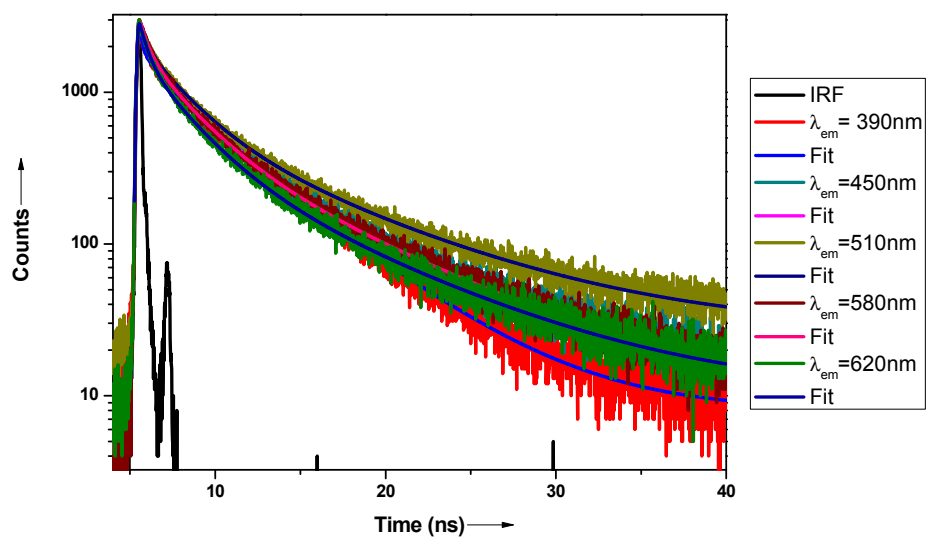

S5:

| $\lambda_{\text{ex}}$<br>(nm) | $\lambda_{\text{em}}$<br>(nm) | $\tau_1$ (ns) | B <sub>1</sub> | $\tau_2$ (ns) | B <sub>2</sub> | $\tau_3$ (ns) | B <sub>3</sub> | $\langle\tau\rangle$ | $\chi^2$ |
|-------------------------------|-------------------------------|---------------|----------------|---------------|----------------|---------------|----------------|----------------------|----------|
| 377                           | 390                           | 0.14          | 2.02           | 1.508         | 16.4           | 5.06          | 81.58          | 4.38                 | 1.09     |
|                               | 410                           | 0.46          | 4.86           | 2.47          | 33.11          | 5.89          | 62.03          | 4.49                 | 1.09     |
|                               | 430                           | 0.41          | 4.51           | 2.38          | 37.67          | 6.63          | 57.82          | 4.75                 | 1.02     |
|                               | 450                           | 0.45          | 5.38           | 2.46          | 39.73          | 7.55          | 54.89          | 5.15                 | 1.05     |
|                               | 470                           | 0.53          | 6.16           | 2.59          | 38.63          | 8.12          | 54.21          | 5.44                 | 1.01     |
|                               | 510                           | 0.37          | 5.68           | 2.41          | 38.76          | 8.52          | 55.57          | 5.69                 | 1.08     |
|                               | 530                           | 0.41          | 6.47           | 2.40          | 40.61          | 8.59          | 52.92          | 5.55                 | 1.02     |
|                               | 580                           | 0.53          | 9.00           | 2.59          | 43.72          | 8.36          | 47.18          | 5.12                 | 1.05     |
|                               | 620                           | 0.50          | 10.72          | 2.48          | 45.03          | 8.10          | 44.25          | 4.75                 | 1.08     |
| 402                           | 430                           | 0.35          | 10.52          | 1.89          | 45.14          | 6.68          | 44.35          | 3.85                 | 1.04     |
|                               | 450                           | 0.36          | 9.31           | 2.05          | 42.81          | 7.18          | 47.88          | 4.35                 | 1.04     |
|                               | 470                           | 0.51          | 9.31           | 2.48          | 43.21          | 8.20          | 47.49          | 5.01                 | 1.07     |
|                               | 510                           | 0.68          | 10.17          | 2.91          | 42.57          | 9.19          | 47.25          | 5.65                 | 1.01     |
|                               | 530                           | 0.68          | 9.24           | 2.79          | 41.6           | 8.74          | 49.15          | 5.52                 | 1.08     |
|                               | 580                           | 0.65          | 10.06          | 2.58          | 40.72          | 7.97          | 49.22          | 5.04                 | 1.05     |
|                               | 620                           | 0.53          | 10.08          | 2.29          | 41.15          | 7.44          | 48.77          | 4.62                 | 1.03     |



S6:

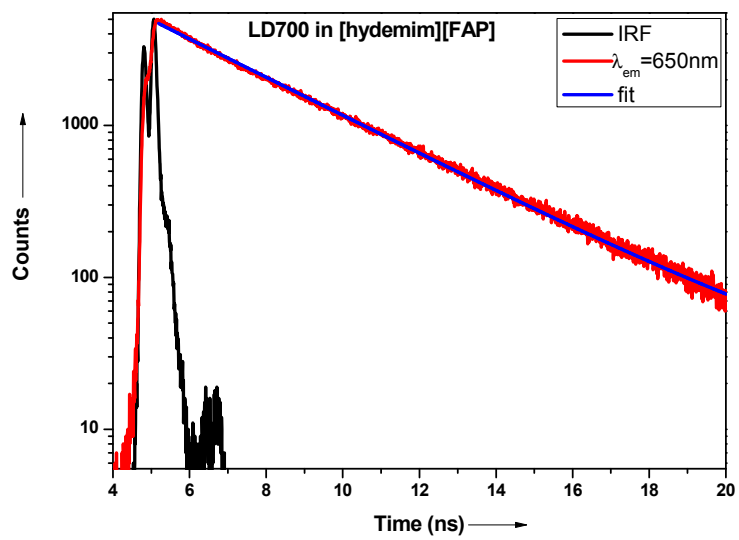

S7:

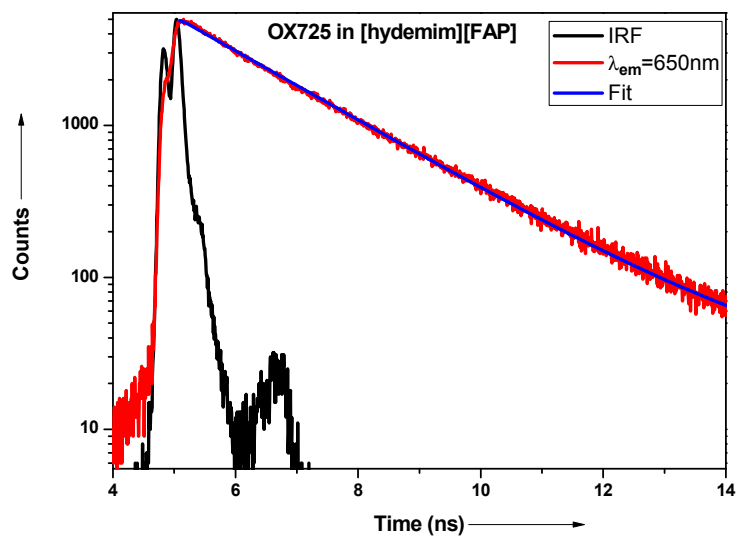

S8:

| Dye    | RTIL           | $\lambda_{\text{ex}}$ (nm) | $\lambda_{\text{em}}$ (nm) | $\tau_1$ (ns) | $\chi^2$ |
|--------|----------------|----------------------------|----------------------------|---------------|----------|
| LD 700 |                | 634                        | 650                        | 3.80          | 1.18     |
|        | [emim][FAP]    | 402                        | 650                        | 3.54          | 1.01     |
|        |                | 377                        | 650                        | 3.42          | 1.19     |
|        |                | 634                        | 650                        | 3.45          | 1.16     |
|        | [hydemim][FAP] | 402                        | 650                        | 3.48          | 1.11     |
|        |                | 377                        | 650                        | 3.46          | 1.11     |
| 634    |                | 650                        | 1.86                       | 1.06          |          |
| OX725  | [emim][FAP]    | 402                        | 650                        | 1.94          | 1.10     |
|        |                | 377                        | 650                        | 1.84          | 1.04     |
|        |                | 634                        | 650                        | 1.78          | 1.25     |
|        | [hydemim][FAP] | 402                        | 650                        | 1.71          | 1.08     |
|        |                | 377                        | 650                        | 1.63          | 1.25     |
|        |                | 634                        | 650                        | 1.78          | 1.25     |

S9:

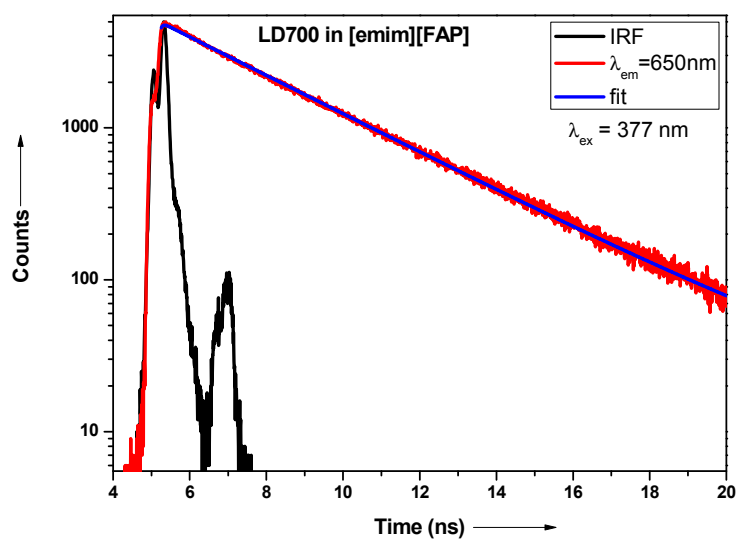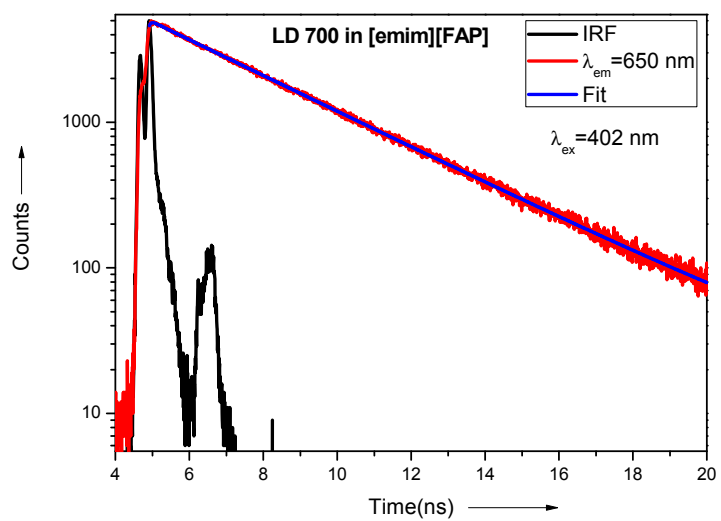

S10

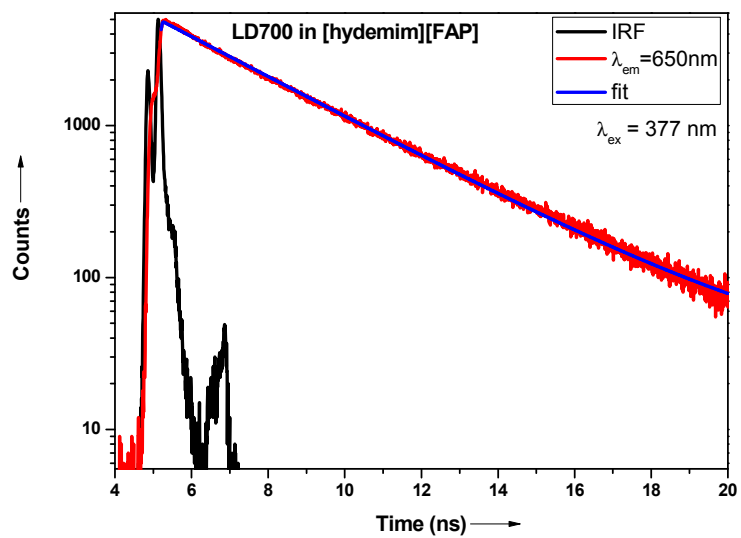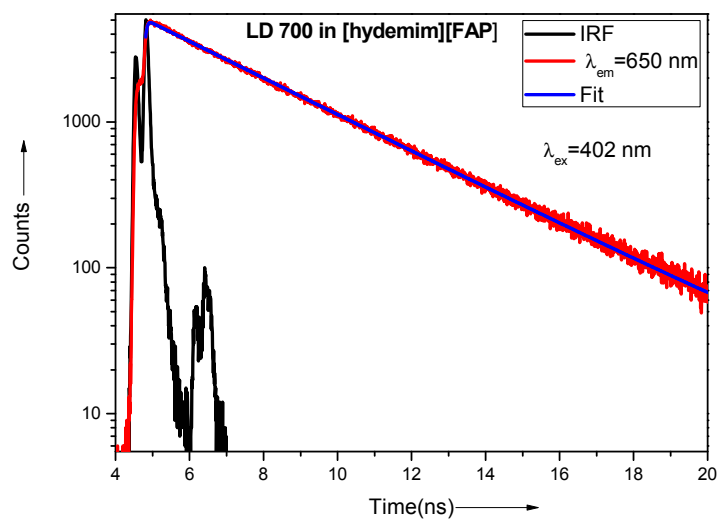

S11:

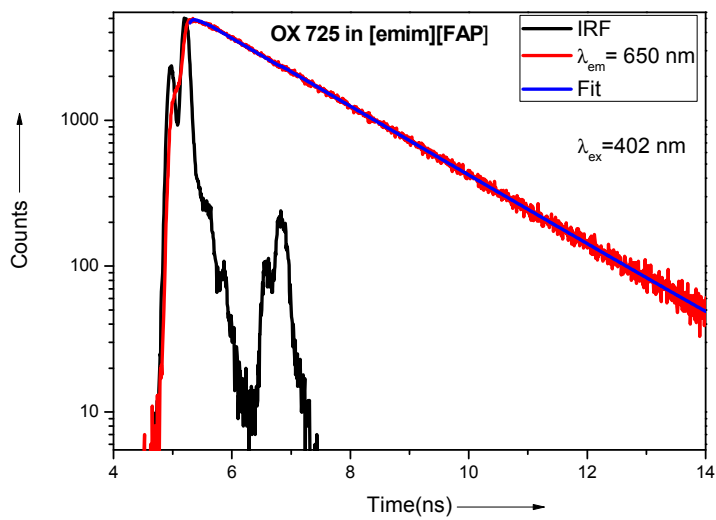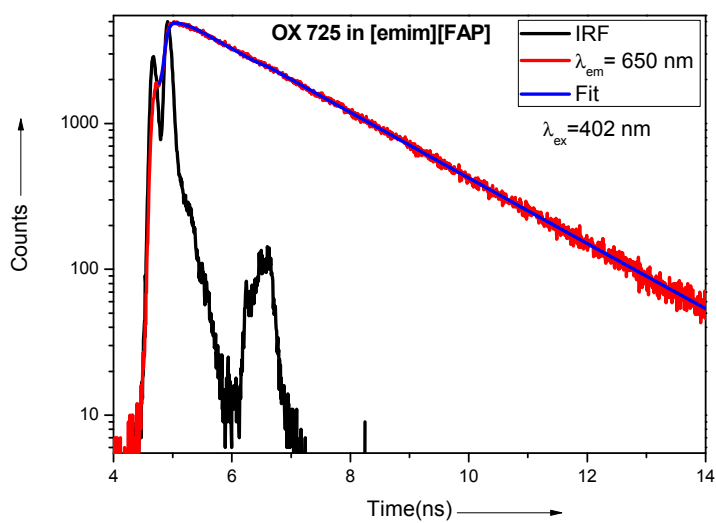

S12:

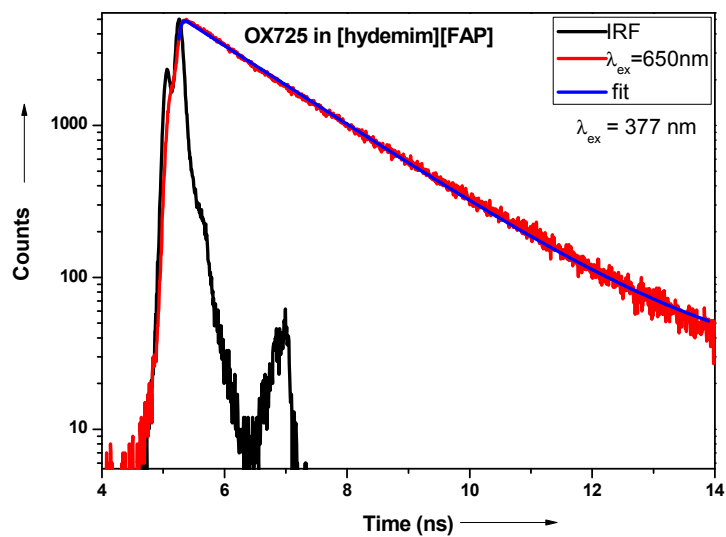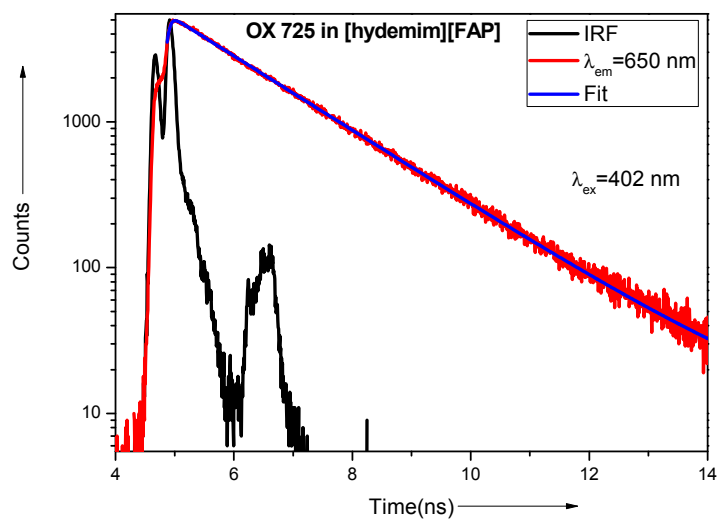

S13:

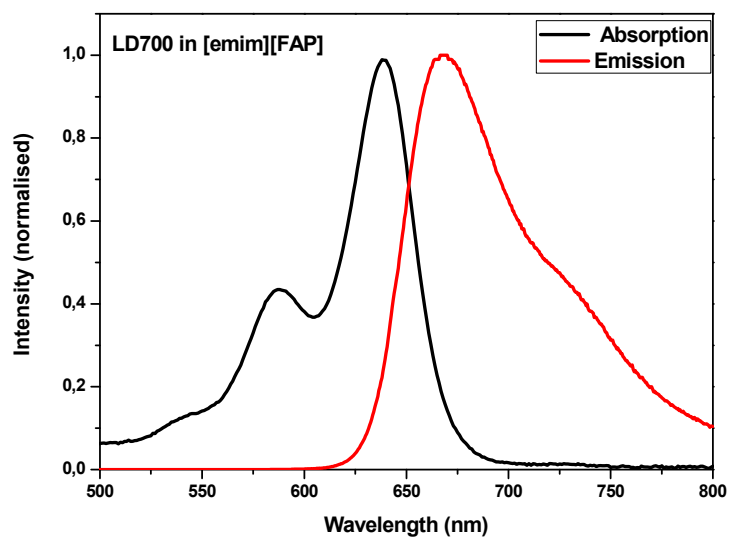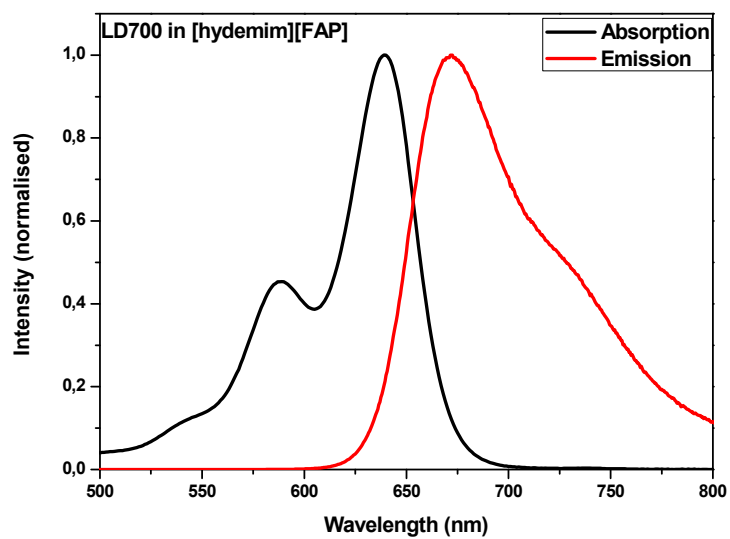



S14:

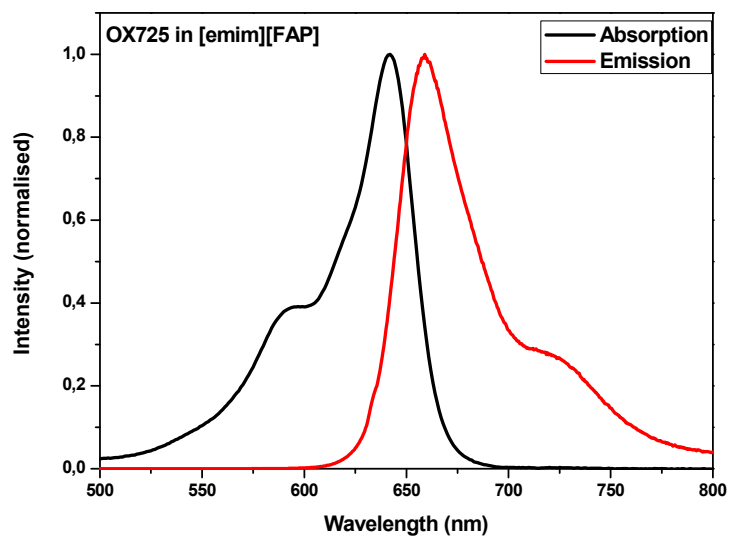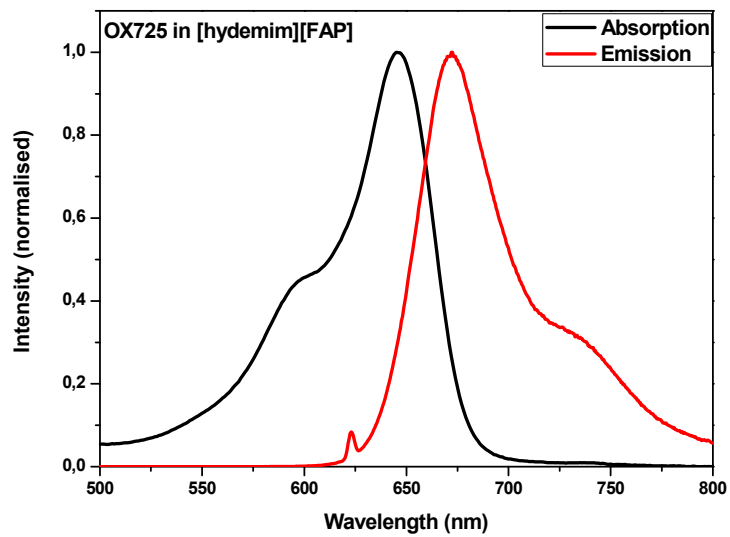

Supplement: c2cc32177g.pdf [file c2cc32177g.pdf]
